# Supplementary material
Source: MDPI journal article supplement (https://www.mdpi.com/1999-4907/11/12/1263)
Supplement: s1 [file s1]

## Supplementary Material

**Table S1** Hypothesized effects and references about the explanatory variables used in the regression models.

| Variable                     | Definition                                                                     | Unit                                                         | Hypothesized effect | Literatures                                                                                                                                                                                              |
|------------------------------|--------------------------------------------------------------------------------|--------------------------------------------------------------|---------------------|----------------------------------------------------------------------------------------------------------------------------------------------------------------------------------------------------------|
| Age of head                  | Age of household head                                                          | Years                                                        | Positive            | “Older rural people are assumed to have greater knowledge of the utilization and extraction of non-timber forest products (NTFPs) than younger ones and their dependence would therefore be higher.” [1] |
| Family size                  | Number of family members in the household                                      | Persons                                                      | Positive            | The more labor available, the more participation in labor intensive forest product extraction activities, accordingly the more dependence on forest. [1–3]                                               |
| Farmland area (hectare)      | Size of owned farmland                                                         | Hectare                                                      | Negative            | Generally, wealthier households in Myanmar’s rural communities owned larger size of land. The size of owned land has a negative effect on dependency on forest. [1,4]                                    |
| Total cash income (USD/year) | The sum of the cash income generated from the different sources of a household | USD/year                                                     | Negative            | Higher total income with better income sources may be lower dependency on forest for cash income. [5]                                                                                                    |
| Duration of residence        | Years of residence at the current living place                                 | Years                                                        | Negative            | “The longer households have lived in a village, the less likely they are to clear old-growth forest in part, because they have more secure usufruct rights to their land.” [6]                           |
| Education                    | Education level of the household head                                          | Primary (grade 1–4)<br>Middle (grade 5–8)<br>High (grade 9–) | Negative            | Higher education creates better employment opportunities. Education level is expected to have a negative effect on dependency on forest for cash income. [7,8]                                           |
| Accessibility to forest      | The time to the reserved forests (RFs) to collect forest products              | Bad (more than 1 day)                                        | Positive            | Better accessibility to forest may cause higher dependency on forest resources. [9,10]                                                                                                                   |

|                                     |                                                                             |                       |          |                                                                                                                                                                                                               |
|-------------------------------------|-----------------------------------------------------------------------------|-----------------------|----------|---------------------------------------------------------------------------------------------------------------------------------------------------------------------------------------------------------------|
|                                     |                                                                             | Good<br>(within 1day) |          |                                                                                                                                                                                                               |
| House possession                    | A household owns a house for the permanent settlement                       | Own<br>Not own        | Negative | People with permanent settlement in Myanmar may be unlikely to be engaged in encroachment and may be less dependent on forests for their livelihoods, compared with people without permanent settlement. [11] |
| Knowledge about the law of RFs      | Household head's knowledge about the prohibited access to RFs by Forest Law | Known<br>Unknown      | Negative | Having knowledge about the prohibited matter may drive one not to depend on forest for commercial purposes. [12]                                                                                              |
| Knowledge about the boundary of RFs | Household head's knowledge about the boundary of RFs                        | Known<br>Unknown      | Negative | Having knowledge about the boundary may drive not to depend on forest for commercial purpose. [12]                                                                                                            |

## References

1. Soe, K.T.; Yeo-Chang, Y. Livelihood dependency on non-timber forest products: Implications for REDD+. *Forests* **2019**, *10*, 1–25, doi:10.3390/f10050427.
2. Garekae, H.; Thakadu, O.T. Socio-economic factors influencing household forest dependency in Chobe enclave , Botswana. *Ecol. Process.* **2017**, doi:10.1186/s13717-017-0107-3.
3. Aung, P.S.; Adam, Y.O.; Pretzsch, J.; Peters, R. Distribution of forest income among rural households: A case study from Natma Taung national park, Myanmar. *For. Trees Livelihoods* **2015**, *24*, 190–201, doi:10.1080/14728028.2014.976597.
4. Moe, K.T.; Liu, J. Economic Contribution of Non-timber Forest Products (NTFPs) to Rural Livelihoods in the Tharawady District of Myanmar. *Int. J. Sci.* **2016**, *2*, 12–21, doi:10.18483/ijsci.904.
5. Mamo, G.; Sjaastad, E.; Vedeld, P. Economic dependence on forest resources: A case from Dendi District, Ethiopia. *For. Policy Econ.* **2007**, *9*, 916–927, doi:10.1016/j.forpol.2006.08.001.
6. Godoy, R.; Neill, K.O.; Groff, S.; Kostishack, P.; Cubas, A.; Demmer, J.; Mcsweeney, K.; Overman, J.; Wilkie, D.; Brokaw, N. Household Determinants of Deforestation Amerindians in Honduras. *World Dev.* **1997**, *25*, 977–987.
7. Hlaing, Z.C.; Kamiyama, C.; Saito, O. Interaction between Rural People's Basic Needs and Forest Products: A Case Study of the Katha

District of Myanmar. *Int. J. For. Res.* **2017**, 2017, 1–18, doi:10.1155/2017/2105012.

8. Illukpitiya, P.; Yanagida, J.F. Role of income diversification in protecting natural forests: Evidence from rural households in forest margins of Sri Lanka. *Agrofor. Syst.* **2008**, 74, 51–62, doi:10.1007/s10457-008-9153-2.
9. Win, Z.C.; Mizoue, N.; Ota, T.; Wang, G.; Innes, J.L.; Kajisa, T.; Yoshida, S. Spatial and temporal patterns of illegal logging in selectively logged production forest: a case study in Yedashe, Myanmar. *J. For. Plan.* **2018**, 23, 15–25, doi:10.20659/jfp.23.2\_15.
10. Khai, T.C.; Mizoue, N.; Kajisa, T.; Ota, T.; Yoshida, S. Stand structure, composition and illegal logging in selectively logged production forests of Myanmar: Comparison of two compartments subject to different cutting frequency. *Glob. Ecol. Conserv.* **2016**, 7, 132–140, doi:10.1016/J.GECCO.2016.06.001.
11. Iftekhar, M.S.; Hoque, A.K.F. Causes of forest encroachment: An analysis of Bangladesh. *GeoJournal* **2005**, 62, 95–106, doi:10.1007/s10708-005-7917-z.
12. Htun, N.Z.; Mizoue, N.; Yoshida, S. Determinants of Local People's Perceptions and Attitudes Toward a Protected Area and Its Management : A Case Study From Popa Mountain Park, Central Myanmar. *Soc. Nat. Resour.* **2012**, 25, 743–758, doi:10.1080/08941920.2011.620597.
